# Supplementary material
Source: PubMed Central journal article supplement (PMC3365961)
Supplement: supp_M111.310615_jbc.M111.310615-2.pdf [file supp_M111.310615_jbc.M111.310615-2.pdf]

## Supplemental Figure S2

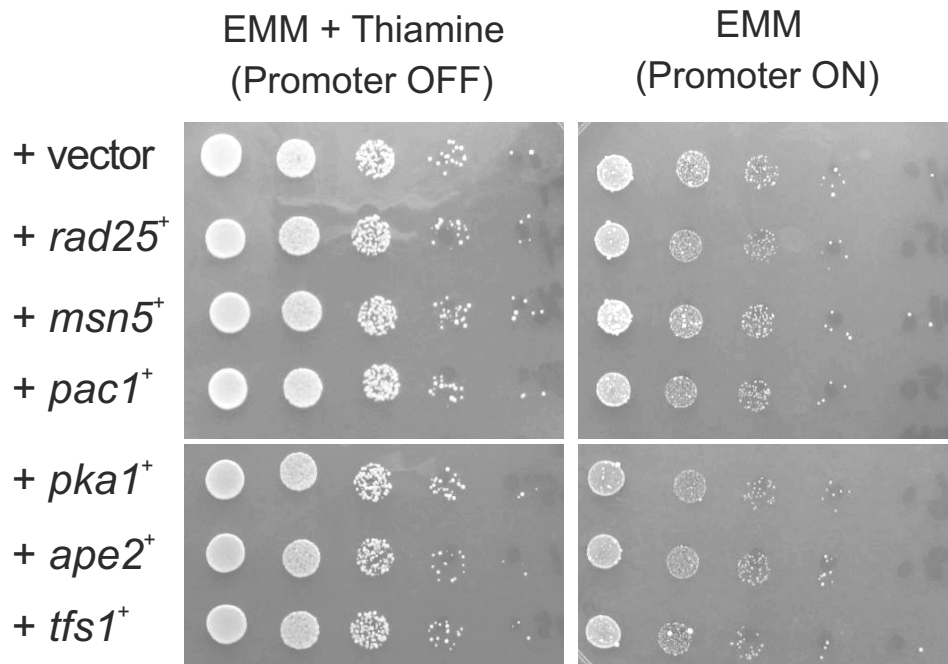

**Supplemental Figure S2.** Overexpression of multicopy suppressor genes failed to suppress the growth defect caused by the high expression of constitutive active calcineurin. The KP2670 cells were transformed with the multicopy plasmid carrying various genes as indicated, and were spotted and incubated as described in Fig.3A.
