# Supplementary material
Source: PubMed Central journal article supplement (PMC3365961)
Supplement: supp_M111.310615_jbc.M111.310615-3.pdf [file supp_M111.310615_jbc.M111.310615-3.pdf]

# Supplemental Figure S3

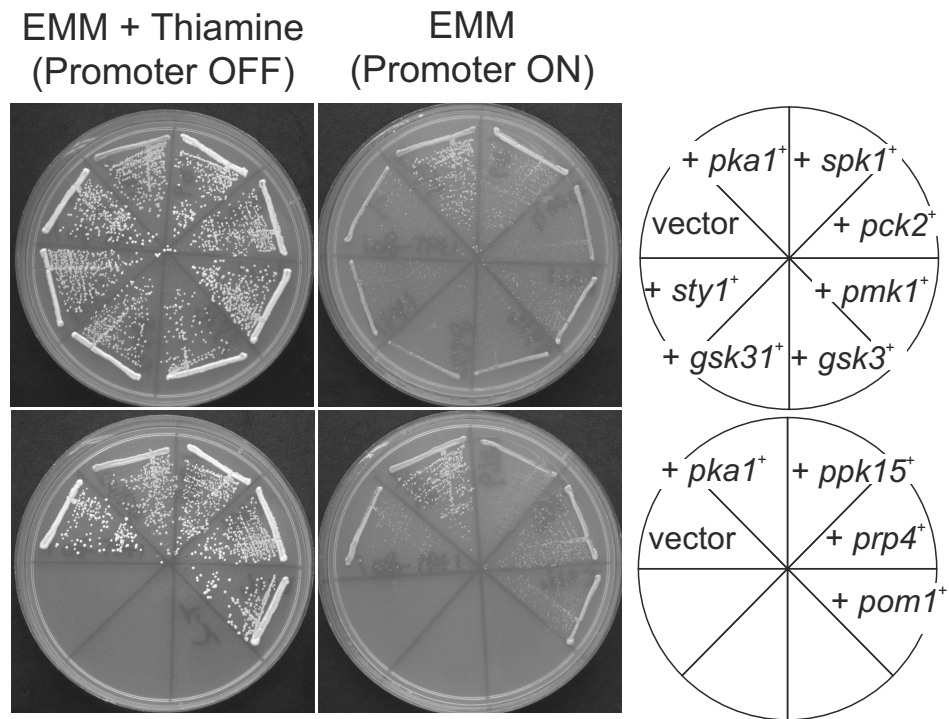

**Supplemental Figure S3.** The effect of kinases on the slow growth phenotype caused by Prz1-overexpression. Prz1-overexpression cells were transformed the multicopy plasmid carrying various genes as indicated, and were streaked as described in Fig. 1A.
